# Supplementary material
Source: publisher figshare collection journal article supplement (https://acs.figshare.com/ndownloader/files/9137755)
Supplement: Supplementary file 1 [file 9137755]

## **Supporting Information**

### **Study of Compression Induced Supramolecular Nanostructures of an Imidazole**

#### **Derivative by Langmuir-Blodgett Technique**

Bapi Dey<sup>†</sup>, P. Debnath<sup>†</sup>, S. Chakraborty<sup>‡</sup>, B. Deb<sup>§</sup>, D. Bhattacharjee<sup>†</sup>, S. Majumdar<sup>§</sup>, Syed

Arshad Hussain<sup>†\*</sup>

<sup>†</sup> Thin film and Nanoscience Laboratory, Department of Physics, Tripura University, Suryamaninagar 799022, Tripura, India

<sup>‡</sup> Department of Physics, NIT Agartala, Jiraniya 799046, Tripura, India

<sup>§</sup> Department of Chemistry, Tripura University, Suryamaninagar 799022, Tripura, India

\* Corresponding author

Email: sa\_h153@hotmail.com, sahussain@tripurauniv.in

Ph: +919862804849 (M), +91381 2375317 (O)

Fax: +913812374802 (O)

## Contents

**Figure S1.** BAM images of **1** at air-water interface taken at various stages during  $\pi$ -A isotherm measurement.

**Figure.S2.**  $\pi$  - A isotherm of **1** at different concentration and spread volume.

**Figure S3.** AFM images of one layer LB film of **1** at 5 mN/m on optially blank space with different scan area.

**Figure.S4.** AFM images of one layer LB film of **1** at 5 mN/m on optially shown structures with different scan area

**Figure.S5.** AFM images of nanorods and nanowires of **1** in one layer LB film at different pressure.

**Figure.S6.** AFM images of **1** nanorods in one layer LB film with aging.

**Figure.S7.** AFM images of **1** nanowires in one layer LB film with aging.

**Figure S8.** Normalized UV-vis absorption spectra of **1** in solution and LB film.

**Figure S9.** Normalized emission and excitation spectra of **1** in solution and in LB film.

**Figure.S10.** XRD spectra of **1** in 10 layer LB film.

**Figure S11.** AFM images of **1** one layer LB film at 0 mN/m.

**Figure S12.** AFM images of **1** in spin coated and drop cast film.

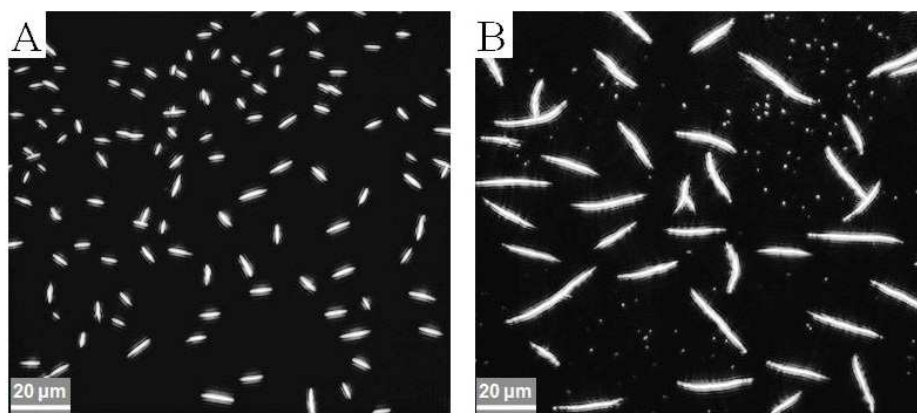

**Figure S1:** BAM images of **1** at air-water interface taken at surface pressure 5mN/m (A) and 15mN/m (B) during  $\pi$ -A isotherm measurement.

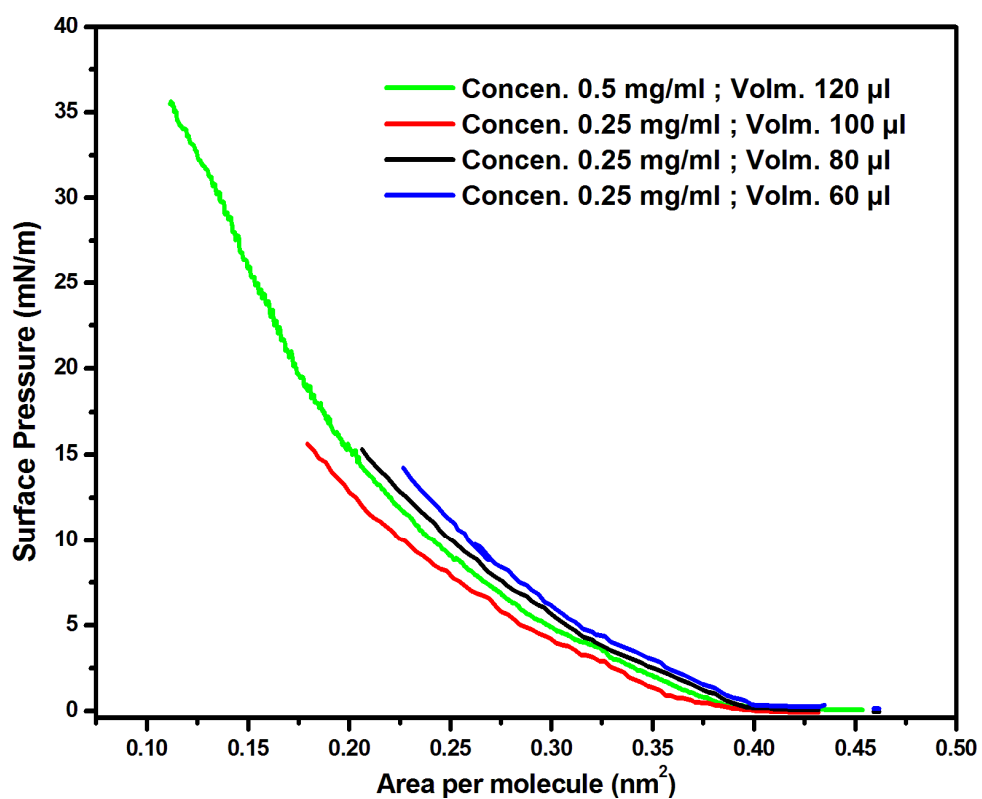

**Figure S2.** Surface pressure ( $\pi$ ) vs area per molecule (A) isotherm of **1** at various concentration and spreading volume.

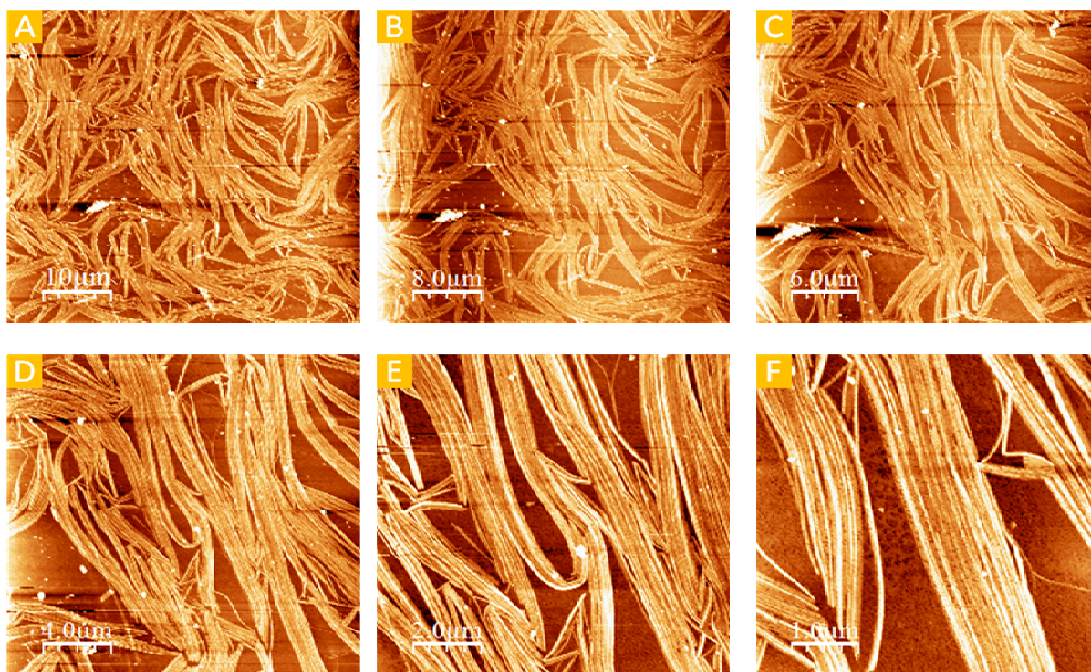

**Figure S3.** AFM images of one layer LB film of **1** at 5 mN/m on optically blank space at scan area- (A)  $50 \times 50 \mu\text{m}^2$  (B)  $40 \times 40 \mu\text{m}^2$  (C)  $30 \times 30 \mu\text{m}^2$  (D)  $20 \times 20 \mu\text{m}^2$  (E)  $10 \times 10 \mu\text{m}^2$  (F)  $5 \times 5 \mu\text{m}^2$ .

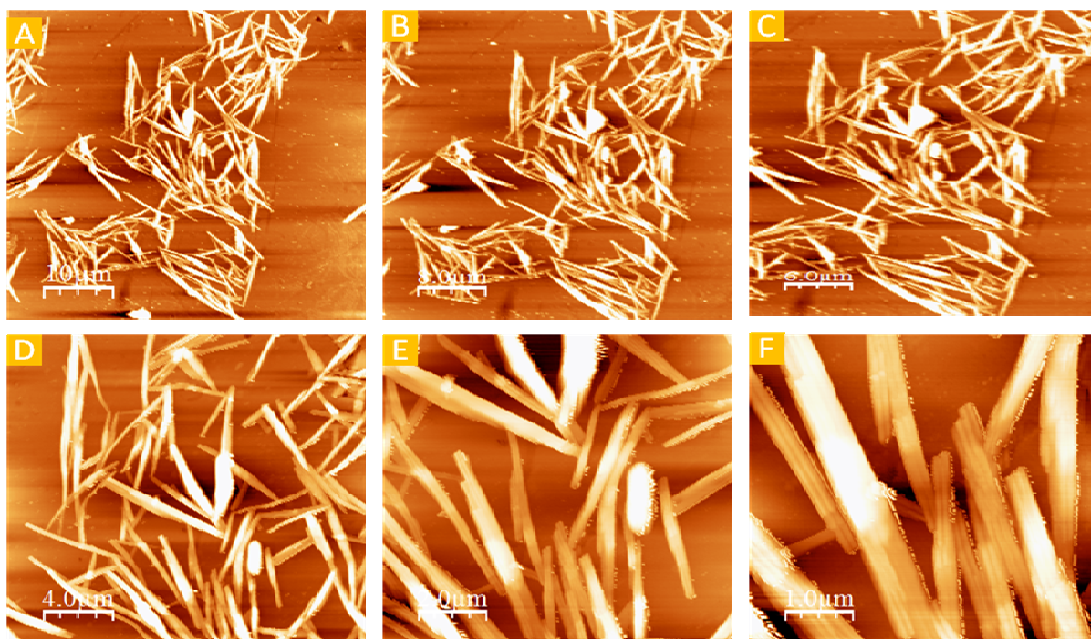

**Figure S4.** AFM images of one layer LB film of **1** at 5 mN/m on optically shown structures at scan area- (A)  $50 \times 50 \mu\text{m}^2$  (B)  $40 \times 40 \mu\text{m}^2$  (C)  $30 \times 30 \mu\text{m}^2$  (D)  $20 \times 20 \mu\text{m}^2$  (E)  $10 \times 10 \mu\text{m}^2$  (F)  $5 \times 5 \mu\text{m}^2$ .



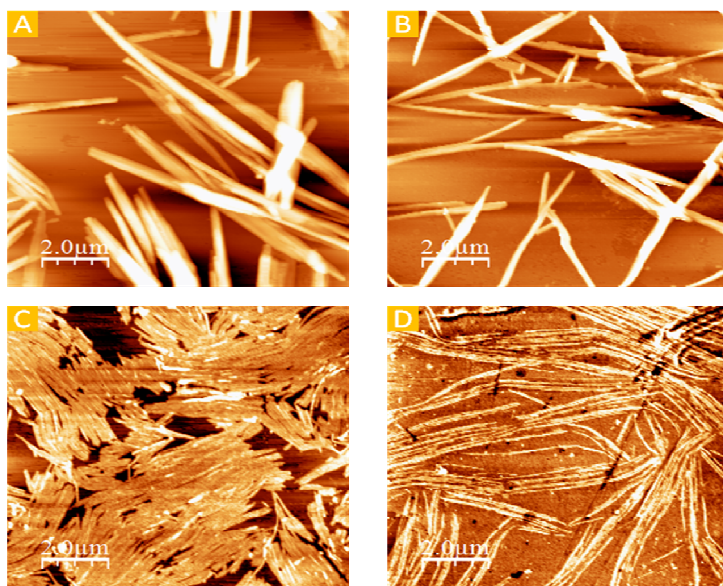

**Figure S5.** AFM images for nanorods in one layer LB film of **1** molecule at 10 mN/m (A), 20 mN/m (B) and nanowires at 15 mN/m (C), 20 mN/m (D). Scan area-  $10 \times 10 \mu\text{m}^2$  for all images.

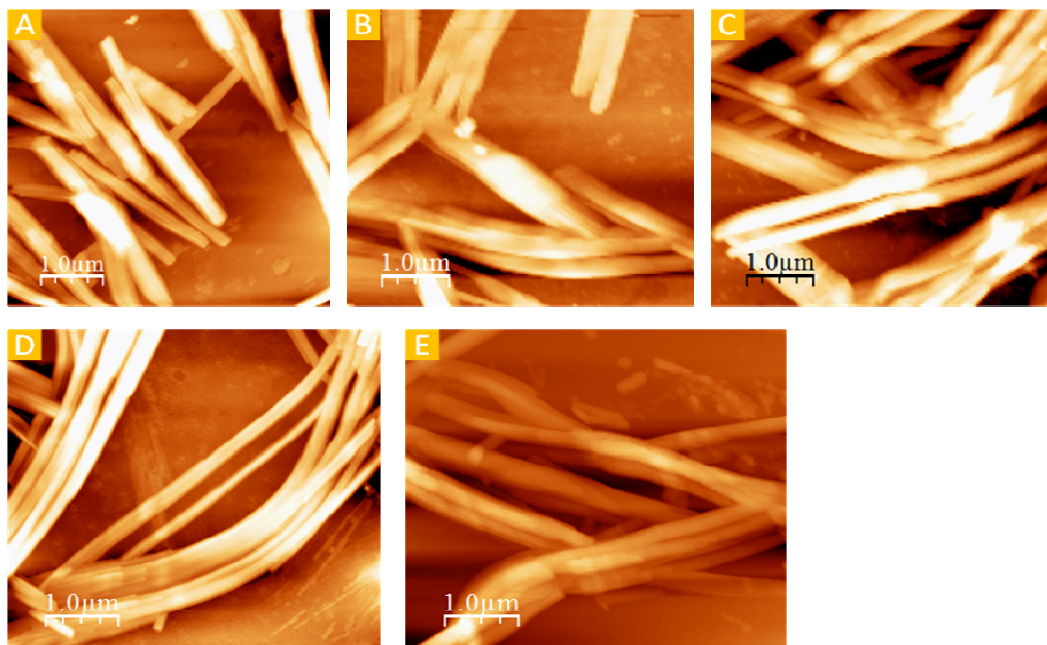

**Figure S6.** AFM images for nanorods in one layer LB film of **1** taken at 5 mN/m after- (A) 2 days (B) 3 days (C) 4 days (D) 5 days (E) 6 days. Scan area-  $5 \times 5 \mu\text{m}^2$  for all images.

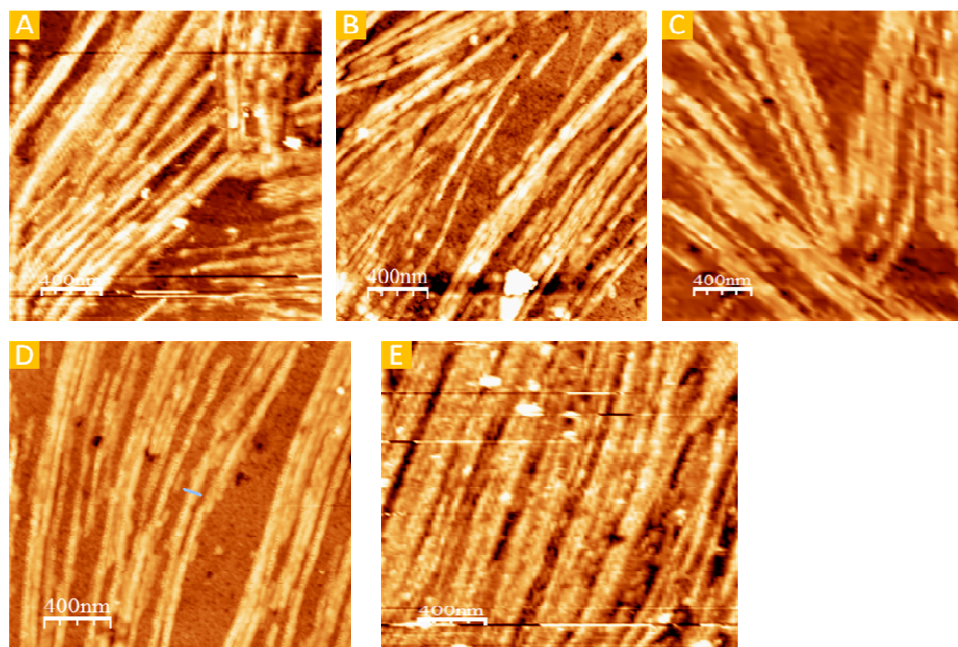

**Figure S7.** AFM images for nanowires in one layer LB film of **1** taken at 5 mN/m after- (A) 2 days (B) 3 days (C) 4 days (D) 5 days (E) 6 days. Scan area-  $2 \times 2 \mu\text{m}^2$  for all images.

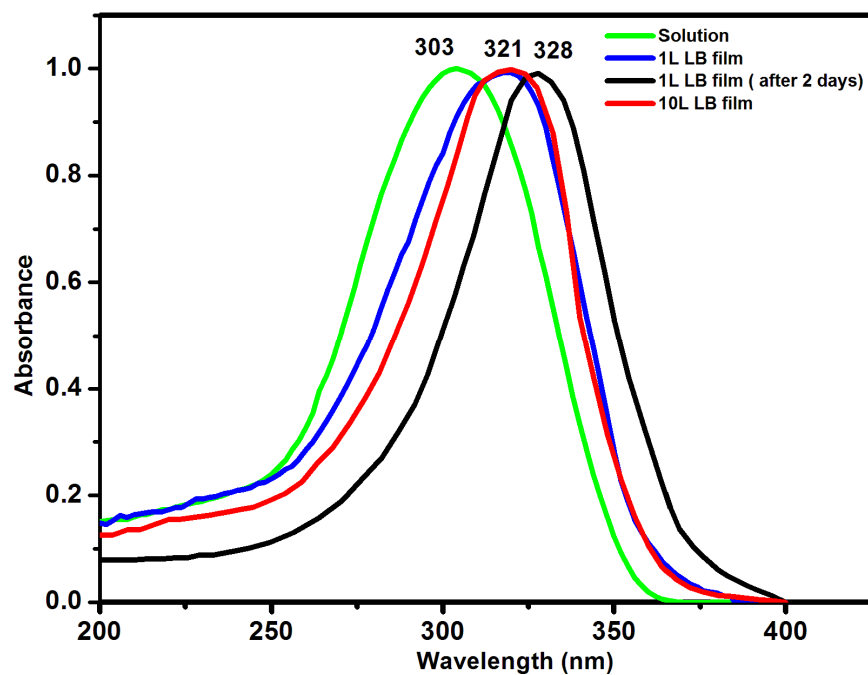

**Figure S8.** Normalized UV-vis absorption spectra of **1** in solution and one layer LB film lifted at surface pressure 5 mN/m.

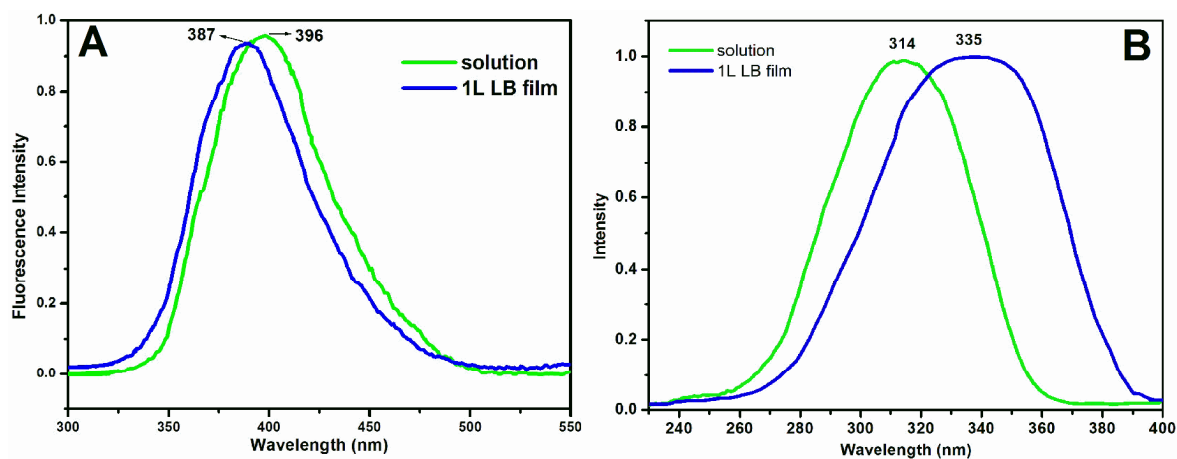

**Figure S9 :** (A) Steady state fluorescence spectra of **1** in solution ( $\lambda_{\text{ex}} = 300$  nm) and in one layer LB film ( $\lambda_{\text{ex}} = 320$  nm) deposited at 5 mN/m. (B) Corresponding excitation spectra of the same monitored at the emission maximum for both solution and LB film.

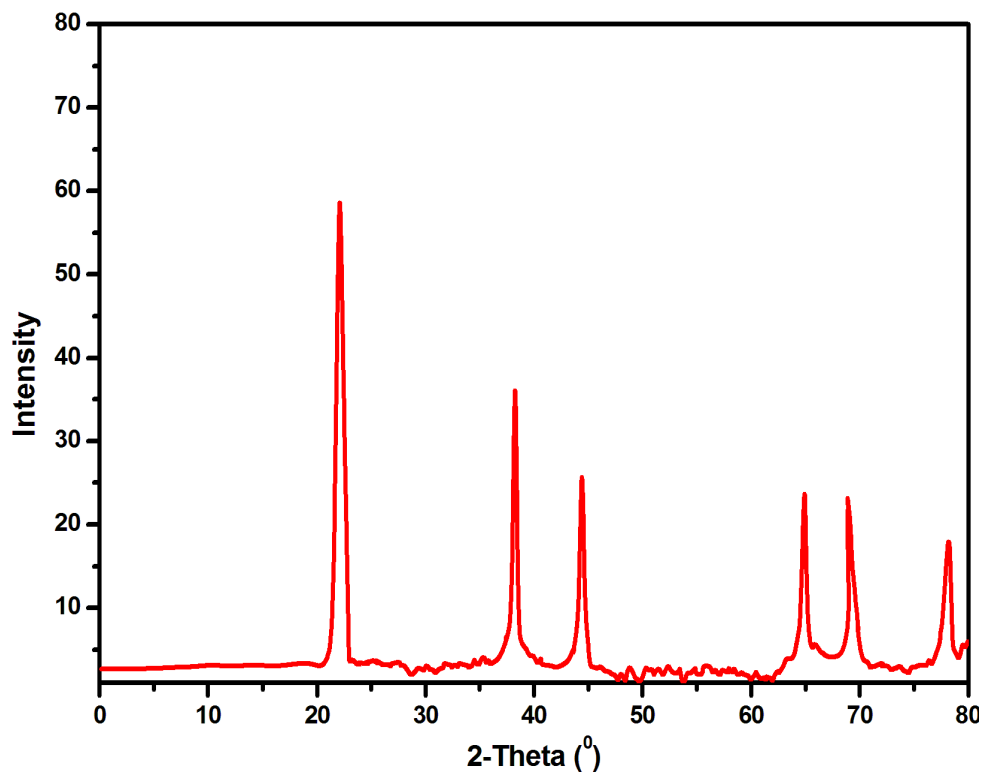

**Figure S10 :** XRD spectra of compound **1** in 10 layer LB film deposited at surface pressure 5 mN/m.

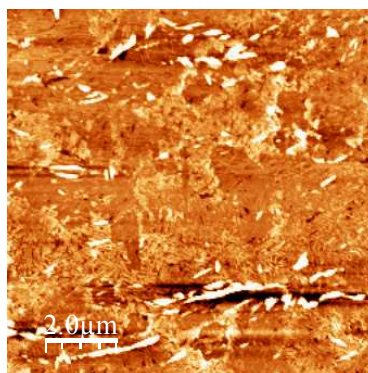

**Figure S11.** AFM images of **1** in one layer LB film at 0 mN/m.

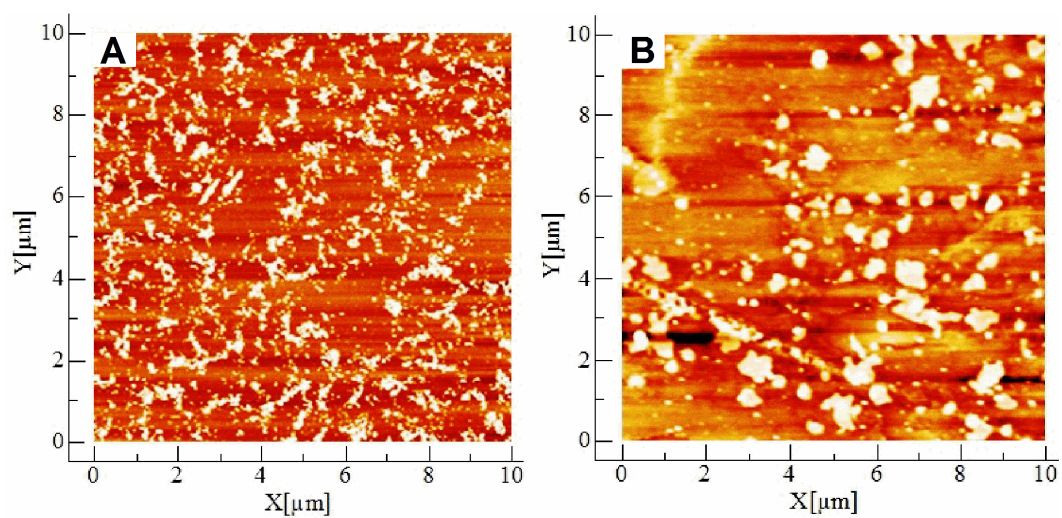

**Figure S12.** AFM images of compound **1** for spin coated film (A) and drop cast film (B).
